# Supplementary material
Source: publisher site journal article supplement (https://www.spandidos-publications.com/4000/downloadSupplementary)
Supplement: Supplementary file 1 [file downloadSupplementary]

## Sheet: Sheet1
Table SV. KEGG DISEASE and BioCyc analysis of differentially expressed genes.
Term	Database	Input number	Background number	P-Value	Input
Cardiovascular diseases	KEGG DISEASE	3	342	0.003805	RPS24|P2RY12|HLA-DQA1
Dilated cardiomyopathy	KEGG DISEASE	1	35	0.032059	HLA-DQA1
allopregnanolone biosynthesis	BioCyc	1	6	0.006314	AKR1C3
cardenolide biosynthesis	BioCyc	1	6	0.006314	AKR1C3
glycogenolysis	BioCyc	1	7	0.007213	MGAM
lacto-series glycosphingolipids biosynthesis	BioCyc	1	8	0.008111	B3GNT5
androgen biosynthesis	BioCyc	1	11	0.0108	AKR1C3
neolacto-series glycosphingolipids biosynthesis	BioCyc	1	13	0.012589	B3GNT5
icosapentaenoate biosynthesis II (metazoa)	BioCyc	1	13	0.012589	ACSL1
gamma-linolenate biosynthesis	BioCyc	1	14	0.013483	ACSL1
fatty acid activation	BioCyc	1	15	0.014375	ACSL1
arachidonate biosynthesis III (metazoa)	BioCyc	1	16	0.015267	ACSL1
superpathway of steroid hormone biosynthesis	BioCyc	1	19	0.017937	AKR1C3
fatty acid beta-oxidation (peroxisome)	BioCyc	1	22	0.0206	ACSL1
fatty acid alpha-oxidation	BioCyc	1	23	0.021486	ACSL1
fatty acid beta-oxidation	BioCyc	1	23	0.021486	ACSL1
fatty acid alpha-oxidation III	BioCyc	1	25	0.023256	ACSL1
super pathway of glycosphingolipids biosynthesis	BioCyc	1	25	0.023256	B3GNT5
stearate biosynthesis	BioCyc	1	26	0.02414	ACSL1
